# Supplementary material
Source: PubMed Central journal article supplement (PMC4662618)
Supplement: NIHMS720503-supplement-Supp_TableS1.pdf [file NIHMS720503-supplement-Supp_TableS1.pdf]

## Supporting Information

### Inactivation of *Fam20B* in the dental epithelium of mice leads to supernumerary incisors

TIAN Y, MA P, LIU C, YANG X, CRAWFORD D, YAN W, BAI D, QIN C, WANG X

Texas A&M University Baylor College of Dentistry, Dallas, TX, USA; and  
West China School of Stomatology, Sichuan University, Chengdu, Sichuan, China

**Table S1:** Primers for PCR screen, South blotting probes, genotyping and RT-PCR

| Primer name | Primer sequence (5'-3')      |
|-------------|------------------------------|
| 3' screen-F | GCTGACCGCTTCCTCGTGCTTTA      |
| 3' screen-R | CTGAACCACAGCCTATGGAGGCA      |
| 5' probe-F  | AGCCAGACTTTAGTCCCAAAGTGCA    |
| 5' probe-R  | CCAAGAGCAATGCCTTGCCA         |
| 3' probe-F  | GCCACTTCCCACATGAGCAGAAAC     |
| 3' probe-R  | TGTGTGTCTGTGGGCGTGCTGTA      |
| Neo probe-F | CCTGAATGAACTGCAGGACGAGG      |
| Neo probe-R | AGCTCTTCAGCAATATCACGGGTAGC   |
| Flox-F      | GAGCTTCCCCAAGAACTTAAACTCC    |
| Flox-R      | GAATACTGCTTCTACCTCTGCAACCATC |
| Rec-R       | GAGCCTGAGGCATAACACCAACC      |
| Cre-F       | CCCGCAGAACCTGAAGATG          |
| Cre-R       | GACCCGGCAAAACAGGTAG          |
| RT-F        | GTAGAAGGGGAGCCATACGC         |
| RT-R        | CAGCATCGCAGTAGCTCTCA         |
